# Supplementary material
Source: Research Square preprint supplement (doi:10.21203/rs.3.rs-9320431/v1)
Supplement: Supplementary file 1 [file 0e3aeb5c6e01ebf5ec592c76.docx]

Table 1 Names, origins, and pedigrees of the seven wheat parent genotypes.

| No | Name | Origin | Pedigree |
| --- | --- | --- | --- |
| 1 | Sakha 69 | Egypt | Inia/RL 4220//7C/Yr “s” |
| 2 | Sakha 93 | Egypt | Sakha 92/TR 810328 |
| 3 | Gemmiza 3 | Egypt | Bb/7C*2//Y50/Kal*3//Sakha8/4/Prv/WW/5/3/Bg”s”//OnCGM.4024-1GM13 GM2GM-0GM |
| 4 | Gemmiza 7 | Egypt | CMH74 A. 630/5x//Seri 82/3/Agent CGM.4611-2GM-3GM-1GM-0GM |
| 5 | Seds 4 | Egypt | Maya "s"/Mon "S"/CM H74.A592/3/Giza 157*2 |
| 6 | Baviacora 92 | Exotic | BOW/NAC//VEE/3/BJY/COC |
| 7 | Miriam | Exotic | - |

Table 2 Morley‒Jones analysis of variance for ten wheat traits in a 7 × 7 half-diallel cross.

| S.O.V | df | PH | SL | NT | NS | SW | NG/S | SGW | NSP | SD | GY/P |
| --- | --- | --- | --- | --- | --- | --- | --- | --- | --- | --- | --- |
| a | 6 | 152.12** | 5.09** | 8.90** | 7.83** | 2.35** | 179.92** | 1.15** | 5.64** | 0.02** | 25.58** |
| b | 21 | 18.03** | 0.45** | 4.32** | 4.89** | 0.51** | 103.75** | 0.45** | 2.23** | 0.02** | 36.54** |
| b1 | 1 | 33.44** | 0.09ns | 26.30** | 39.77** | 0.13ns | 118.26** | 0.81** | 19.05** | 0.08** | 12.24ns |
| b2 | 6 | 14.93** | 0.40** | 2.24** | 2.50** | 0.99** | 183.83** | 0.86** | 2.54** | 0.02** | 56.76** |
| b3 | 14 | 18.26** | 0.50** | 3.64** | 3.42** | 0.33* | 68.39** | 0.26** | 0.90ns | 0.01* | 29.61** |
| Error | 54 | 13.66 | 0.27 | 0.64 | 0.59 | 0.41 | 26.33 | 0.299 | 2.12 | 0.01 | 16.84 |
| Baker ratio | | 0.94 | 0.96 | 0.80 | 0.76 | 0.90 | 0.78 | 0.84 | 0.83 | 0.66 | 0.58 |
| CV% | | 3.60 | 3.81 | 7.87 | 8.04 | 13.51 | 7.41 | 15.72 | 7.27 | 18.44 | 6.56 |

PH: Plant height; SL: Spike length; NT: Number of tillers; NS: Number of spikes; SW: Spike weight; NG/S: No. of grains/spikes; SGW: Spike grain weight; NSP: No. of spikelets; SD: Spike density; GY/P: Grain yield/plant. Statistically significant differences at **p ≤ 0.05* and ***p ≤ 0.01*; ns: indicates a nonsignificant difference.

Table 3 Estimation of genetic parameters for ten traits in wheat via the Hayman method.

| Parameters | PH | SL | NT | NS | SW | NG/S | SGW | NSP | SD | GY/P |
| --- | --- | --- | --- | --- | --- | --- | --- | --- | --- | --- |
| D | 70.30±9.70** | 3.50±0.10** | 2.83±1.51ns | 2.39±1.55ns | 1.80±0.23** | 229.44±42.38** | 1.07±0.18** | 5.16±0.71** | 0.01±0.01ns | 8.90±19.91ns |
| H1 | 62.40±23.36** | 1.76±0.24** | 15.72±3.64** | 17.04±3.72** | 2.11±0.57** | 473.70±102.02** | 1.88±0.44** | 6.82±1.70** | 0.05±0.01** | 157.59±47.94** |
| H2 | 52.53±20.58* | 1.46±0.21** | 13.81±3.21** | 14.88±3.28** | 1.31±0.50** | 311.57±89.90** | 1.18±0.39** | 4.98±1.50** | 0.04±0.01** | 109.81±42.24** |
| F | 13.35±23.28ns | 1.86±0.24** | 0.12±3.62ns | 0.36±3.71ns | 1.65±0.56** | 322.15±101.66** | 1.31±0.44** | 5.13±1.70** | 0.02±0.01ns | 36.50±47.77ns |
| h2 | 16.08±13.83ns | 0.01±0.14ns | 14.62±2.15** | 22.17±2.20** | 0.00±0.33ns | 61.60±60.38ns | 0.40±0.26ns | 10.33±1.01** | 0.04±0.01** | 3.87±28.37ns |
| E | 5.38±3.43ns | 0.09±0.04* | 0.21±0.53ns | 0.20±0.55ns | 0.15±0.08ns | 9.37±14.98ns | 0.113±0.07ns | 0.68±0.25** | 0.005±0.002* | 6.09±7.04ns |
|  | 0.94 | 0.71 | 2.36 | 2.67 | 1.08 | 1.44 | 1.33 | 1.15 | 2.27 | 4.21 |
| H2/H1 | 0.84 | 0.83 | 0.88 | 0.87 | 0.62 | 0.66 | 0.63 | 0.73 | 0.80 | 0.70 |
| H2/4H1 | 0.21 | 0.21 | 0.22 | 0.22 | 0.16 | 0.16 | 0.16 | 0.18 | 0.19 | 0.17 |
| KD/KR | 1.22 | 2.20 | 1.02 | 1.06 | 2.48 | 2.91 | 2.72 | 2.52 | 2.13 | 2.90 |
| h2/H2 | 0.31 | 0.01 | 1.06 | 1.49 | 0.00 | 0.20 | 0.34 | 2.07 | 1.11 | 0.04 |
|  | 0.90 | 0.94 | 0.97 | 0.97 | 0.84 | 0.92 | 0.82 | 0.76 | 0.74 | 0.86 |
|  | 0.64 | 0.68 | 0.39 | 0.35 | 0.50 | 0.28 | 0.36 | 0.33 | 0.19 | 0.23 |
| r | -0.65 | -0.22 | -0.04 | 0.09 | 0.76 | 0.74 | 0.90 | -0.86 | -0.62 | -0.30 |

Table 4 Additive dominance model for ten traits of wheat.

| Traits | t2 | Regression coefficient | | | Wr+Vr | Wr-Vr |
| --- | --- | --- | --- | --- | --- | --- |
| (b)±SE | b=0 | b=1 |
| Plant height | 0.27ns | 0.89±0.33 | 2.64* | 0.34ns | 19125.52** | 617.29ns |
| Spike length | 1.18ns | 1.10±0.13 | 8.19** | -0.72ns | 17.86** | 0.30ns |
| No. of tillers | 2.86* | -0.06±0.22 | -0.26ns | 4.77** | 127.37** | 49.05** |
| No. of spikes | 7.06** | -0.29±0.15 | -1.93ns | 8.56** | 115.90** | 56.39** |
| Spike weight | 0.23ns | 0.90±0.31 | 2.86* | 0.32ns | 8.89** | 0.86* |
| No. of grain/spike | 0.89ns | 0.63±0.21 | 3.01* | 1.80ns | 139632.24** | 26705.86** |
| Spike grain weight | 0.40ns | 0.97±0.29 | 3.29* | 0.11ns | 4.62** | 0.81** |
| No. of spikelets | 0.80ns | 0.71±0.18 | 3.83* | 1.59ns | 108.58** | 8.33** |
| Spike density | 0.01ns | 0.61±0.33 | 1.84ns | 1.17ns | 0.003** | 0.001** |
| Grain yield/plant | 5.02** | -0.23±0.18 | -1.32ns | 6.99** | 7522.62** | 9774.21** |
